# Supplementary material
Source: PubMed Central journal article supplement (PMC308854)
Supplement: nar_32_suppl-1_D27__1.pdf [file nar_32_suppl-1_D27__1.pdf]

|                                                  |                                                                                                                                                                       |
|--------------------------------------------------|-----------------------------------------------------------------------------------------------------------------------------------------------------------------------|
| General                                          |                                                                                                                                                                       |
| EMBL-EBI Home Page                               | <a href="http://www.ebi.ac.uk/">http://www.ebi.ac.uk/</a>                                                                                                             |
| EMBL Nucleotide Sequence Database                | <a href="http://www.ebi.ac.uk/embl/">http://www.ebi.ac.uk/embl/</a>                                                                                                   |
| Documentation                                    |                                                                                                                                                                       |
| EMBL Database Documentation                      | <a href="http://www.ebi.ac.uk/embl/Documentation/">http://www.ebi.ac.uk/embl/Documentation/</a>                                                                       |
| User manual                                      | <a href="http://www.ebi.ac.uk/embl/Documentation/User_manual/usrman.html">http://www.ebi.ac.uk/embl/Documentation/User_manual/usrman.html</a>                         |
| Release Notes                                    | <a href="http://www.ebi.ac.uk/embl/Documentation/Release_notes/current/relnotes.html">http://www.ebi.ac.uk/embl/Documentation/Release_notes/current/relnotes.html</a> |
| DDBJ/EMBL/GenBank Feature Table Document         | <a href="http://www.ebi.ac.uk/embl/Documentation/FT_definitions/feature_table.html">http://www.ebi.ac.uk/embl/Documentation/FT_definitions/feature_table.html</a>     |
| Sequence Alignment Submissions document          | <a href="http://www.ebi.ac.uk/embl/Submission/alignment.html">http://www.ebi.ac.uk/embl/Submission/alignment.html</a>                                                 |
| Feature table keys/qualifiers definitions        | <a href="http://www.ebi.ac.uk/embl/WebFeat/">http://www.ebi.ac.uk/embl/WebFeat/</a>                                                                                   |
| Annotation Examples                              | <a href="http://www.ebi.ac.uk/embl/Standards/web/index.html">http://www.ebi.ac.uk/embl/Standards/web/index.html</a>                                                   |
| DE line Standards                                | <a href="http://www.ebi.ac.uk/embl/Documentation/de_line_standards.html">http://www.ebi.ac.uk/embl/Documentation/de_line_standards.html</a>                           |
| Mirror sites                                     | <a href="http://www.ebi.ac.uk/embl/Access/other_sites.html">http://www.ebi.ac.uk/embl/Access/other_sites.html</a>                                                     |
| Submission                                       |                                                                                                                                                                       |
| Submission of Nucleotide Sequence Data           | <a href="http://www.ebi.ac.uk/embl/Submission/">http://www.ebi.ac.uk/embl/Submission/</a>                                                                             |
| Information for Submitters Document              | <a href="http://www.ebi.ac.uk/embl/Documentation/information_for_submitters.html">http://www.ebi.ac.uk/embl/Documentation/information_for_submitters.html</a>         |
| Vector Scanning prior to submission              | <a href="http://www.ebi.ac.uk/blastall/vectors.html">http://www.ebi.ac.uk/blastall/vectors.html</a>                                                                   |
| WEBIN                                            | <a href="http://www.ebi.ac.uk/embl/Submission/">http://www.ebi.ac.uk/embl/Submission/</a>                                                                             |
| Genome Project Submission Account guidelines     | <a href="http://www.ebi.ac.uk/embl/Submission/genomes.html">http://www.ebi.ac.uk/embl/Submission/genomes.html</a>                                                     |
| WEBUP : sequence update form                     | <a href="http://www3.ebi.ac.uk/Services/webin/update/update.html">http://www3.ebi.ac.uk/Services/webin/update/update.html</a>                                         |
| Access                                           |                                                                                                                                                                       |
| Access to servers, query tools and data archives | <a href="http://www.ebi.ac.uk/embl/Access/">http://www.ebi.ac.uk/embl/Access/</a>                                                                                     |
| Sequence Retrieval Service (SRS)                 | <a href="http://srs.ebi.ac.uk/">http://srs.ebi.ac.uk/</a>                                                                                                             |
| Completed Genomes Web Server                     | <a href="http://www.ebi.ac.uk/genomes/">http://www.ebi.ac.uk/genomes/</a>                                                                                             |
| FTP server                                       | <a href="ftp://ftp.ebi.ac.uk/pub/databases/embl/">ftp://ftp.ebi.ac.uk/pub/databases/embl/</a>                                                                         |
| Current release on ftp                           | <a href="ftp://ftp.ebi.ac.uk/pub/databases/embl/release/">ftp://ftp.ebi.ac.uk/pub/databases/embl/release/</a>                                                         |
| Third Party Annotation (TPA) Dataset via ftp     | <a href="ftp://ftp.ebi.ac.uk/pub/databases/embl/tpa/">ftp://ftp.ebi.ac.uk/pub/databases/embl/tpa/</a>                                                                 |
| Complete genomes via ftp                         | <a href="ftp://ftp.ebi.ac.uk/pub/databases/embl/genomes/">ftp://ftp.ebi.ac.uk/pub/databases/embl/genomes/</a>                                                         |
| Whole Genome Shotgun data via ftp                | <a href="ftp://ftp.ebi.ac.uk/pub/databases/embl/wgs/">ftp://ftp.ebi.ac.uk/pub/databases/embl/wgs/</a>                                                                 |
| Alignment data via ftp                           | <a href="ftp://ftp.ebi.ac.uk/pub/databases/embl/align/">ftp://ftp.ebi.ac.uk/pub/databases/embl/align/</a>                                                             |
| Ensembl: automated analysis of genome data       | <a href="http://ensembl.ebi.ac.uk/">http://ensembl.ebi.ac.uk/</a>                                                                                                     |
| Access to searching, browsing and analysis tools | <a href="http://www.ebi.ac.uk/Tools/">http://www.ebi.ac.uk/Tools/</a>                                                                                                 |

Table 1. Internet-based resources of the EMBL database including detailed information on submissions, data access, genome data and database searching and analysis tools.
